# Supplementary material for: Development of a prediction model to estimate the 5-year risk of cardiovascular events and all-cause mortality in haemodialysis patients: a retrospective study
Source: PeerJ. 2022 Nov 9;10:e14316. doi: 10.7717/peerj.14316 (PMC9653067; doi:10.7717/peerj.14316)
Supplement: Supplemental Information 1 [file peerj-10-14316-s001.xlsx]

## Sheet: Sheet1
NO	Age	Sex	DM	History of CV events	Primary kidney disease	Smoker	SBP	DBP	Access at dialysis initiation	Long-term access	Session frequency	Kt/V	Vintage	corrected Ca	P	Alb	Hb	SUA	iPTH	MLR	NLR	RDW	All-cause death	CV events or all-cause death
1	41.0877	Male	0	0	CGN	1	150	90	no AVF	AVF	3/w	1.2	1.54795	2.25	2.17	39	72	490	366.5	0.227273	2.72727	17.3	0	0
2	59.5205	Male	0	0	Others or unknown	1	168	75	no AVF	AVF	Others	1.57	2.88219	2.02	2.81	40.25	112	523.5	137.5	0.5	6.44444	15.2	0	1
3	53.9479	Male	0	0	CGN	1	150	100	no AVF	AVF	Others	1.09	1.54795		0.97		100		495	0.5	4.9	14	0	0
4	82.7945	Male	0	1	CGN	0	130	70	no AVF	no AVF	3/w	1.45	4.96986	2.655	2.045	36.85	122	436.5	136	0.916667	5.41667	13.65	1	1
5	61.7534	Male	0	0	HT	0	138	84	AVF	AVF	Others	1.42	0.630137	2.04	1.805	40.85	130	359.5	113.3	0.346154	3.38462	14.3	0	0
6	62.3397	Female	0	0	HT	0	140	85	AVF	AVF	Others	1.68	0.967123	1.975	2.125	41.1	122.5	604.5	447.5	0.242424	2.9697	14.65	0	0
7	63.0877	Male	0	0	HT	1	119	63	no AVF	AVF	Others	1.02	2.21644	2.79	1.525	34.5	100	465.5	334	0.230769	2.5	14.65	0	0
8	59.8329	Female	0	1	Others or unknown	0	140	80	no AVF	AVF	3/w	1.51	9.55342	2.185	2.06	39.25	96.5	564	12.6	0.4375	5.6875	14.4	0	0
9	68.2575	Male	0	0	CGN	0	181	92	no AVF	AVF	3/w	1.31	6.21918	2.13	2.995	38.6	121.5	486.5	1086.5	0.227273	3.13636	15.7	1	1
10	65.5041	Female	1	1	DN	0	173	79	no AVF	no AVF	Others	1.2	3.30137	2.465	1.995	39.25	116	403.5	65.8	0.428571	4.35714	15.4	0	0
11	52.9151	Male	0	0	HT	0	144	80	AVF	AVF	3/w	1.86	2.88219	2.165	2.165	40.75	100	426.5	461.5	0.428571	3.85714	14.45	0	0
12	29.537	Female	0	0	Others or unknown	0	160	110	no AVF	AVF	Others	1.81	9.22192	1.35	1.935	43.4	73.5	480.5	1269	0.206897	2.96552	18.75	0	0
13	60.1479	Male	0	1	PKD	0	121	87	no AVF	no AVF	Others	1.02	2.71507	2.695	1.915	37.1	108	583	721	0.368421	7	18.9	0	0
14	36.1014	Female	1	0	DN	0	113	61	AVF	AVF	3/w	1.78	4.63288	2.59	2.195	39.05	110.5	386.5	63.2	0.258065	2.83871	14.05	0	0
15	46.5123	Female	1	0	DN	0	169	82	no AVF	AVF	3/w	1.6	1.96712	2.055	2.53	39.65	126	375	313.5	0.352941	4.05882	14	0	0
16	34.0932	Male	0	0	Others or unknown	1	140	80	no AVF	no AVF	3/w	1.19	6.46575	1.69	2.28	43.5	124.5	454.5	134	0.391304	3.91304	14.9	0	0
17	57.9068	Female	1	0	DN	0	122	64	no AVF	AVF	3/w	1.43	5.21918	2.695	1.145	38	113	452	178	0.264706	3.20588	13.55	0	0
18	48.0849	Male	0	0	Others or unknown	0	153	98	no AVF	AVF	Others	1.04	2.13425	1.905	2.76	41.75	107	618	822.5	0.423077	3.88462	14.25	0	1
19	66.3096	Female	0	0	Others or unknown	0	161	96	no AVF	AVF	Others	1.8	0.79726	2.36	1.97	40.3	130	416.5	104.9	0.310345	2.2069	13.95	1	1
20	71.0192	Male	1	0	DN	0	142	77	no AVF	AVF	Others	1.44	1.71507	3.1	1.41	35	128	370.5	141	0.444444	2.44444	14.3	0	0
21	53.0329	Male	0	0	CGN	0	174	109	no AVF	AVF	3/w	1.26	6.63288	2.73	1.775	37.3	102.5	443	425.5	1	10.9091	13.9	0	0
22	73.7562	Female	0	1	Others or unknown	0	180	96	no AVF	AVF	Others		4.88493	2.08	1.86	40.4	112	382	180.55	0.206897	3.24138	15.5	0	0
23	50.7096	Female	1	0	DN	0	130	80	no AVF	AVF	3/w	1.53	3.30137	2.425	1.8	39.25	112	436.5	81.25	0.222222	3.88889	14.35	0	0
24	29.4356	Female	1	0	DN	0	118	80	AVF	AVF	3/w	1.42	2.04932	2.475	1.865	39.5	99	453	69.7	0.333333	2.93939	14.05	0	0
25	65.8466	Female	0	0	Others or unknown	1	161	96	AVF	AVF	Others	1.81	3.63014	1.615	1.945	40.5	108.5	420	512.5	0.388889	4	14.2	0	1
26	34.2603	Female	0	0	CGN	0	130	90	AVF	AVF	Others	1.61	4.55068	2.055	2.125	42.45	119.5	409	296	0.153846	3.19231	13.75	0	0
27	61.611	Male	1	1	DN	0	140	60	no AVF	AVF	Others	1.5	3.63014	1.68	1.915	42.75	122	242.5	15.75	0.380952	3.38095	13.85	0	1
28	65.2575	Female	0	1	Others or unknown	0	152	80	no AVF	AVF	3/w	1.7	9.63562	2.965	2.305	35.95	123.5	620.5	910	0.428571	6.61905	13.4	0	0
29	73.7644	Male	1	1	DN	1	140	80	no AVF	no AVF	3/w	1.25	4.88493	3.245	2	33.75	113.5	484.5	286.5	0.5	6.75	16.45	1	1
30	65.9123	Female	0	0	CGN	0	89	60	no AVF	AVF	Others	1.8	10.3068	2.21	2.36	40.7	111.5	401	1121.5	0.233333	2.7	14.1	0	0
31	69.4575	Male	1	0	DN	0	145	87	AVF	AVF	3/w	1.09	2.04932	2.62	1.765	37	111.5	509.5	142	0.592593	3.48148	14.1	0	1
32	43.0329	Male	0	0	Others or unknown	1	189	115	no AVF	AVF	3/w	1.2	3.54795	2.3	1.86	36.9	99	586	556.5	0.2	3.08	15.9	0	0
33	58.4685	Male	0	1	Others or unknown	0	107	65	no AVF	AVF	3/w	1.22	6.46575	2.315	2.205	38.15	123.5	437.5	317.5	0.541667	4.79167	14.25	0	0
34	83.9836	Female	1	1	DN	0	143	72	no AVF	AVF	3/w	1.48	8.46849	3.395	2.285	36.4	126	520	575	0.407407	3.59259	13.65	0	0
35	34.926	Male	0	1	Others or unknown	0	157	107	AVF	AVF	3/w	1.21	4.88493	2.265	2.445	39.6	100	381.5	350	0.3	2.65	12.95	0	1
36	51.1315	Female	0	0	Others or unknown	0	189	121	no AVF	AVF	Others	1.4	5.05205	2.48	2.18	38.85	99	553.5	343	0.2	4.075	16.05	0	1
37	55.8274	Female	1	0	Others or unknown	0	110	70	AVF	AVF	3/w	1.44	0.882192	3.275	3.055	33.75	118	477	126.5	0.290323	4.54839	15.3	0	0
38	69.4192	Male	0	1	HT	1	101	53	no AVF	AVF	3/w	1.27	7.30411	2.055	2.485	40.6	132	512.5	1170.5	0.162162	1.89189	14.95	0	1
39	62.3123	Female	0	1	CGN	0	155	64	no AVF	AVF	Others	1.68	3.21644	2.36	3.075	38.2	76	747	349	0.257143	2.48571	13.3	0	0
40	54.3397	Male	1	0	DN	0	192	122	AVF	AVF	Others	1.42	2.71507	2.185	2.35	38.5	105.5	560.5	742	0.583333	5.33333	13.85	0	1
41	52.1178	Female	0	0	CGN	0	123	86	no AVF	AVF	Others	1.42	1.13425	1.945	2.73	40.1	85	434.5	391.5	0.333333	3.75	16.1	0	0
42	74.7041	Male	1	0	Others or unknown	1	150	90	no AVF	AVF	Others	1.2	2.54795	1.69	1.66	42.25	126	448	323.5	0.47619	4.61905	15.95	0	0
43	63.6685	Female	0	0	Others or unknown	0	166	85	no AVF	AVF	Others	1.61	4.46575	2.77	2.255	37.05	83	475	262	0.28	3.24	14.95	0	0
44	56.9014	Male	0	1	CGN	0	144	99	AVF	AVF	3/w	1.5	1.23836	1.9	1.19	41.3	116.5	450.5	234	0.28	3.08	14.6	0	0
45	63.8192	Female	1	0	DN	0	199	101	no AVF	AVF	3/w	1.32	3.21644	2.33	2.395	38.75	91	514.5	385	0.346154	6.26923	14.3	0	0
46	61.5644	Female	0	0	Others or unknown	0	180	88	no AVF	AVF	3/w	1.55	0.463014	2.595	2.545	39.35	93	496.5	43.95	0.380952	4	13.15	0	0
47	18.7096	Female	0	0	Others or unknown	0	78	52	no AVF	AVF	Others	1.07	1.63014	3.35	2.68	34.1	117	708	211.8	0.125	3.125	17.1	0	0
48	73.4164	Female	0	0	Others or unknown	0	135	73	AVF	AVF	Others	1.76	2.46301	2.78	2.39	36.7	99.5	408	291	0.578947	5.42105	15.3	0	0
49	80.3014	Male	1	1	Others or unknown	0	151	71	no AVF	AVF	Others	1.2	1.88219	2.485	1.405	38.05	111	349	291	0.947368	4.47368	14	0	1
50	78.1918	Female	0	1	Others or unknown	0	134	62	no AVF	AVF	Others	1.79	5.30411	3.47	2.025	33.65	115	455.5	127.2	0.285714	1.79592	15.05	0	0
51	71.8192	Female	0	1	Others or unknown	0	151	73	AVF	AVF	Others	1.81	4.63288	1.51	1.385	42.85	90.5	398	787.5	0.35	3.5	15	0	1
52	71.8192	Female	0	1	Others or unknown	0	176	106	AVF	AVF	Others	1.13	4.55068	2.77	2.32	37	83.5	261	727.5	0.333333	4.2381	14.6	0	0
53	39.0849	Male	0	0	CGN	1	150	90	no AVF	AVF	Others	1.36	1.79452	1.58	2.87	43.4	115.5	453	710	0.264706	2.61765	13.4	0	0
54	84.0438	Male	0	0	PKD	0	154	82	no AVF	no AVF	Others	1.38	1.54795	2.5	2.07	37.75	118.5	676.5	370	0.25	2.55	14.45	0	1
55	57.2521	Male	0	0	Others or unknown	0	198	109	no AVF	AVF	3/w	1.36	0.715068	2.26	3.005	39.1	103.5	511.5	235.5	0.552632	3.47368	12.95	0	0
56	54.0603	Female	1	0	DN	0	170	80	AVF	AVF	3/w	1.43	1.47397	2.445	2.135	38.95	118	464.5	97.05	0.225806	2.41935	14.15	0	0
57	30.1918	Male	0	0	CGN	0	109	81	no AVF	AVF	3/w	1.14	1.46301	1.595	2.55	42.8	120	372.5	806.5	0.304348	4	13.85	0	0
58	61.9205	Female	0	0	CGN	0	170	62	no AVF	AVF	Others	1.73	0.630137	1.84	1.725	42	102.5	330.5	202	0.206897	2.96552	14.25	0	0
59	71.0932	Male	0	0	CGN	0	143	80	no AVF	no AVF	Others	1.21	1.37808	2.505	2.005	38.05	96	419.5	141.8	0.416667	4.66667	15.35	0	0
60	38.6521	Male	0	0	CGN	0	150	85	no AVF	no AVF	Others	0.96	1.30137	2.405	2.55	39.7	105	574	768	0.55	5.45	13.55	0	0
61	52.411	Male	0	0	CGN	0	160	100	no AVF	AVF	3/w	1.34	0.463014	2.05	1.735	39.9	120	438	198	0.3	2.6	15.4	0	0
62	51.4932	Male	0	0	DN	1	150	90	no AVF	AVF	Others	1.19	1.21644	1.42	2.785	44.05	125	376	67.3	0.434783	3.95652	14.55	0	1
63	74.5096	Female	0	0	CGN	1	122	65	no AVF	AVF	Others		2.13425	2.48	2.04	38.8	124.5	308	86.55	0.186047	1.44186	14.45	0	1
64	57.9178	Male	1	0	CGN	0	140	90	no AVF	AVF	3/w		32.9041	2.59	1.515	38	117	292	80.55	0.65942	7.41304	15.5	0	0
65	66.589	Male	1	0	CGN	0	138	67	AVF	AVF	3/w		3.79726	2.225	2.94	40.3	117	566	25	0.375	2.39583	14.55	0	1
66	66.5041	Male	1	1	DN	0	102	84	AVF	AVF	3/w		8.13699	2.43	2.48	40	135.5	557.5	539	0.222222	2.02222	13.85	0	0
67	63.3397	Male	0	0	PKD	1	133	106	AVF	AVF	Others		4.96986	2.97	2.4	37	120.5	583	49.05	0.333333	7.42857	16	0	0
68	38.5699	Male	0	1	HT	0	150	90	no AVF	AVF	3/w		4.04932	1.83	2.63	41.7	124	511.5	700	0.185185	2.14815	12.45	0	0
69	39.1562	Female	0	0	Others or unknown	0	125	81	no AVF	AVF	Others		1.96712	2.65	2.34	37.6	105	415	131	0.28	2.6	13.45	0	0
70	54.411	Male	1	0	CGN	0	106	73	AVF	AVF	Others		6.46575	2.65	3.035	39.25	133	385	95.55	0.518519	5.66667	15	0	1
71	61.2548	Male	1	1	DN	0	140	78	no AVF	AVF	3/w		8.05205	2.06	2.56	41.15	102.5	483	1038.5	0.333333	6.06667	15	0	0
72	58.4137	Male	0	0	CGN	1	132	94	AVF	AVF	3/w		20.1452	3.27	1.91	34.1	125	459.5	373.6	0.333333	2.52381	14.05	0	1
73	38.4849	Female	0	0	Others or unknown	0	130	80	AVF	AVF	Others		14.3096	2.915	1.935	37.2	111.5	328	152	0.454545	3.04545	14.6	0	0
74	65.589	Female	1	1	DN	0	179	75	AVF	AVF	3/w		6.21918	2.615	1.18	39.15	112	353	132.5	0.409091	3.27273	15.45	0	0
75	50.6603	Female	0	0	CGN	1	150	80	no AVF	AVF	3/w		21.1479	1.99	2.435	41.9	109.5	528	196.5	0.48	3.12	14	0	0
76	52.0795	Female	0	1	Others or unknown	0	170	100	no AVF	AVF	3/w		12.0548	2.925	2.745	36.45	114.5	459		0.310345	2.86207	14.6	0	0
77	78.9315	Female	0	1	HT	0	131	86	AVF	AVF	3/w		0.967123	1.83	1.69	43	125.5	256	86.9	0.333333	2.19048	15.5	0	0
78	66.8384	Male	0	0	CGN	1	130	90	AVF	AVF	3/w		1.54795	1.57	2.31	43.25	117	533.5	258	0.235294	3.20588	14.2	0	0
79	71.2603	Male	0	1	CGN	1	150	90	no AVF	AVF	3/w		10.0548	2.065	1.82	40.85	116.5	328	139	0.36	3.2	14.6	0	0
80	58.4986	Male	0	1	CGN	1	146	80	AVF	AVF	3/w		12.1397	2.84	2.15	35.95	135	572	594.5	0.3125	2.75	19.3	0	0
81	39.5699	Female	0	0	Others or unknown	0	123	95	no AVF	no AVF	Others		7.71781	3.21	1.925	34	96	439.5	468.5	0.277778	1.33333	16.4	0	0
82	58.0027	Male	1	1	CGN	1	143	78	AVF	AVF	3/w		4.46575	1.885	1.245	41.35	111	347.5	244	0.392857	3.75	14.7	0	0
83	41.8219	Male	0	0	Others or unknown	1	90	60	AVF	AVF	3/w		16.5589	2.71	3.205	36.9	125.5	523.5	1137	0.5	3.34615	14.75	0	0
84	48.0767	Male	0	0	Others or unknown	0	98	70	no AVF	AVF	3/w		3.13425	3.065	1.635	35.95	114	449	35.45	0.257143	1.42857	16.05	1	1
85	47.5753	Female	0	0	Others or unknown	0	89	71	AVF	AVF	3/w		9.38356	3.35	1.81	36.25	108	434.5	389	0.392857	3.82143	15.75	0	0
86	59.4986	Male	0	0	Others or unknown	0	155	96	AVF	AVF	Others		2.21644	2.705	1.66	38.05	106.5	382.5	49.25	0.318182	4.31818	13.45	0	0
87	43.9068	Male	0	0	HT	0	114	78	AVF	AVF	Others		4.30137	3.285	2.5	34.6	117	492	409.5	0.454545	4.45455	15.5	0	0
88	59.4986	Female	0	0	CGN	0	169	88	no AVF	AVF	Others		1.88219	2.27	2.85	39.85	112	552	192	0.533333	5.53333	15.55	0	0
89	62.5014	Male	0	0	CGN	1	140	80	AVF	AVF	3/w		18.0603	2.035	1.71	41.85	119.5	346.5	56.15	0.333333	2.57143	14.05	0	0
90	52.4959	Male	0	0	Others or unknown	0	166	108	AVF	AVF	3/w		0.79726	2.03	1.37	39.65	102	483.5	17.65	0.631579	3.42105	13.85	0	0
91	50.9123	Male	0	1	Others or unknown	0	90	60	no AVF	AVF	3/w		18.726	1.66	1.595	43.2	135	361.5		0.72	4.52	15.55	0	1
92	38.2384	Male	0	0	Others or unknown	0	140	95	no AVF	AVF	3/w		7.55068	1.86	1.525	43.6	105	359	1211.5	0.30303	4.18182	13.95	0	0
93	36.3205	Male	0	0	CGN	1	157	95	AVF	AVF	3/w		2.13425	2.215	3.39	40.95	94	583	722.5	0.384615	4.5	14.95	0	0
94	51.3315	Female	0	0	HT	0	170	90	no AVF	AVF	Others		0.79726	1.985	3.26	40.4	99.5	447.5	238	0.296296	2.18519	14.7	0	0
95	29.6466	Male	0	0	Others or unknown	1	176	108	AVF	AVF	Others		7.21918	1.925	1.77	41.55	105.5	505	27.7	0.4375	4.9375	15.1	0	0
96	36.4	Male	0	0	CGN	1	128	78	no AVF	AVF	3/w		4.96986	1.62	2.28	41.4	119	514	650	0.212121	2	14.8	0	0
97	34.3205	Male	0	0	Others or unknown	1	171	111	no AVF	AVF	Others		4.55068	1.88	2.715	41.9	100	403	1554	0.3	2.65	13.45	0	0
98	33.4822	Male	1	1	DN	1	151	87	AVF	AVF	3/w		0.715068	2.86	3.255	36.25	109.5	541	219.5	0.333333	5.66667	13.8	0	0
99	58.7507	Male	0	1	HT	1	170	92	no AVF	AVF	3/w	1.09	0.715068	2.665	2.815	38.2	99	420	168.9	0.823529	7.82353	14.75	1	1
100	69.8301	Female	0	0	Others or unknown	1	99	65	no AVF	AVF	3/w	1.87	3.37808	3.055	1.315	36.3	104.5	327.5	257	0.315789	2.78947	15.15	0	0
101	60.2521	Female	0	0	Others or unknown	0	170	86	no AVF	AVF	Others	1.79	2.21644	2.33	2.2	38.8	131	553.5	88.75	0.347826	5.34783	17.35	0	0
102	53.4959	Male	1	0	DN	1	160	90	no AVF	AVF	3/w	1.29	2.21644	2.32	1.755	39.55	114	447	268.5	0.3	4.13333	15.4	0	0
103	77.3507	Male	0	1	Others or unknown	0	146	62	no AVF	AVF	3/w	1.21	6.21918	2.865	0.995	36.6	119.5	480.5	172.55	0.769231	7.15385	14.75	0	1
104	58.9178	Female	0	0	Others or unknown	0	174	87	no AVF	AVF	Others	1.85	0.967123	1.83	1.605	41.75	105.5	398	101.75	0.206897	3.34483	14.4	0	0
105	62.9205	Male	1	1	CGN	1	168	71	AVF	AVF	3/w	1.44	7.13699	3.19	2.545	36.1	107.5	452	379	0.458333	4.25	15.4	0	0
106	50.3315	Female	0	0	Others or unknown	0	132	80	no AVF	AVF	3/w		12.3863	2.79	2.935	37.85	106.5	588	1084	0.333333	4.04762	14.15	0	0
107	29.8986	Female	0	0	CGN	0	141	96	no AVF	AVF	Others		4.8	2.54	2.25	38.55	114.5	336	148.5	0.363636	3.18182	13.55	0	0
108	76.6795	Male	0	0	HT	0	181	95	no AVF	AVF	Others		1.88219	1.51	1.085	43.1	112.5	362.5	97.05	0.354839	2.25806	13.25	0	1
109	36.8192	Female	0	0	Others or unknown	0	151	103	no AVF	AVF	Others		4.46575	2.405	2.515	39.6	141	437	698.5	0.363636	5.04545	14.65	0	0
110	46.2438	Female	0	0	Others or unknown	0	151	75	no AVF	AVF	3/w		3.46301	3.2	1.565	33.9	88.5	502.5	473	0.318182	5.40909	15.4	0	0
111	58.2521	Female	0	0	CGN	0	140	90	AVF	AVF	3/w		24.063	2.75	1.92	37.9	109	388		0.352941	1.70588	14.5	0	0
112	39.4849	Male	0	0	CGN	0	103	80	no AVF	AVF	Others		17.2274	2.41	1.875	40.7	120		663	0.294118	3.47059	12.6	0	0
113	38.4849	Male	0	0	CGN	1	130	80	no AVF	AVF	3/w		13.2247	2.34	2.135	40.3	102	460	356	0.4	4.5	14.7	0	0
114	28.9836	Male	0	0	CGN	0	146	80	no AVF	AVF	3/w	0.92	11.0548	1.905	2.59	41.7	89	569	1100.5	0.25	2	13.4	0	0
115	41.5726	Female	0	0	CGN	0	125	76	no AVF	AVF	3/w		17.6411	4.46	1.76	31.4	104.5	355.5	217.5	0.307692	1.92308	15.05	0	0
116	31.5644	Male	0	0	Others or unknown	1	124	91	no AVF	AVF	3/w		6.63288	2.58	2.095	39.2	97	401.5	368.5	0.2	3.35	14.65	0	0
117	51.6603	Male	0	0	Others or unknown	0	131	91	no AVF	AVF	Others		20.4767	2.365	1.74	40.2	126.5	410	110.5	0.444444	3.55556	14.15	0	0
118	61.5014	Female	0	0	Others or unknown	0	130	80	no AVF	AVF	3/w		20.0603	3.095	1.625	36.4	107.5	375.5	133	0.366667	1.3	14.15	0	0
119	46.9945	Male	0	0	CGN	0	100	70	no AVF	AVF	Others		4.71781	2.19	1.955	40.15	119	556.5	606.5	0.34375	2.5	15.95	0	0
120	28.4795	Male	0	0	CGN	1	191	118	AVF	AVF	3/w		3.63014	1.93	3.08	42.2	97.5	577	730.5	0.275	2.925	13.6	0	0
121	40.2384	Male	1	0	DN	1	106	87	no AVF	AVF	Others		1.96712	2.305	1.845	39.85	114.5	452.5	63.45	0.181818	1.52273	13.55	0	1
122	47.4055	Male	0	0	Others or unknown	0	107	76	AVF	AVF	3/w		4.63288	3.175	1.79	35.45	98.5	399.5	114.05	0.24	2.28	14.65	0	1
123	43.5726	Male	0	0	HT	0	130	80	no AVF	AVF	Others		2.37808	2.77	3.525	36.05	108.5	473.5	736	0.578947	6.84211	15.55	0	0
124	43.6548	Male	0	1	HT	0	150	90	no AVF	AVF	Others		3.37808	2.4	2.82	38.85	81	603	724	0.380952	3.42857	13.8	0	0
125	29.9836	Male	0	0	PKD	0	90	60	AVF	AVF	3/w		11.5534	2.81	1.355	37.15	121	531.5	15.7	0.461538	5.46154	14.25	0	0
126	38.4	Male	0	0	CGN	1	120	80	no AVF	AVF	Others		14.6384	2.47	2.025	38.6	106.5	616	662	0.454545	3.31818	13.65	0	0
127	61.2548	Female	0	0	Others or unknown	0	114	71	AVF	AVF	Others	1.38	8.30411	2.74	2.135	37.9	94.5	536	967.5	0.411765	6.05882	14.8	0	0
128	43.1589	Male	0	0	CGN	0	118	76	no AVF	AVF	Others	1.39	7.71781	1.325	2.835	44.05	100.5	547.5	1714	0.2	3.55	13.4	0	0
129	40.9918	Male	0	0	HT	1	133	84	no AVF	AVF	Others	0.92	11.0548	2.79	2.93	37.55	123.5	467.5	1508	0.28125	2.9375	14.35	0	0
130	43.9918	Male	0	0	CGN	1	115	73	no AVF	AVF	Others	1.13	8.38356	1.74	2.98	41.85	116	613	922	0.423077	3.15385	13.55	0	0
131	45.8247	Male	0	0	Others or unknown	1	140	85	no AVF	AVF	3/w	0.91	12.0548	2.645	2.15	40.4	106	455	19	0.235294	2.44118	14.5	0	0
132	46.4904	Female	0	0	Others or unknown	0	140	90	AVF	no AVF	3/w	1.41	4.96986	2.32	1.465	39.5	110	412	740.5	0.275862	2.93103	14	0	0
133	52.7479	Male	0	0	HT	0	98	58	no AVF	AVF	3/w	1.23	7.38082	2.545	1.78	38.95	125.5	598.5	229	0.461538	6.15385	13.65	0	1
134	56.4986	Male	0	0	Others or unknown	1	92	58	AVF	AVF	3/w	1.1	4.63288	2.465	2.145	37.6	136.5	488	274	0.222222	2.91667	14.15	0	0
135	60.2521	Male	0	0	Others or unknown	1	160	90	no AVF	AVF	Others	1.08	6.96986	1.395	2.27	43.55	113	458.5	726.5	0.555556	3.33333	14.1	0	0
136	49.0795	Male	0	0	Others or unknown	1	166	106	AVF	no AVF	3/w	1.05	21.1479	2.395	1.61	38.8	114.5	528	347.5	0.375	4.45833	15.35	0	0
137	64.589	Female	0	0	CGN	0	71	56	no AVF	no AVF	3/w	1.52	14.0575	2.965	1.655	35.75	106	359	857.5	0.307692	2.88462	14.1	0	0
138	63.7534	Male	0	0	Others or unknown	0	120	80	no AVF	AVF	Others	1.08	3.30137	1.92	1.79	40.5	135.5	632	332	0.352941	4.17647	14	0	0
139	57.0849	Female	0	0	Others or unknown	0	130	80	no AVF	AVF	Others	1.36	2.21644	2.47	2.485	38.65	112	467	304	0.233333	3.46667	16.15	0	0
140	50.2466	Female	0	0	CGN	0	136	85	no AVF	AVF	3/w	1.44	6.13699	2.265	2.8	40.75	95.5	634	373	0.333333	3.74074	12.75	0	0
141	33.7342	Male	0	0	CGN	1	140	85	AVF	AVF	3/w	1.35	7.21918	1.695	2.41	42.85	99	406	249	0.521739	4.73913	15.55	0	0
142	36.9041	Male	0	0	HT	1	134	78	no AVF	AVF	3/w	0.92	1.21644	2.135	3.12	40.05	122.5	491	161	0.652174	4.21739	13.1	0	0
143	59.4137	Female	0	0	Others or unknown	0	128	78	AVF	AVF	3/w	1.41	2.54795	1.87	2.86	42.05	98.5	433	171.5	0.263158	2.84211	12.8	0	0
144	38.5699	Male	0	0	CGN	1	150	80	no AVF	AVF	3/w	1.01	10.0548	2.135	2.355	41.05	120.5	477	53.35	0.297297	3.37838	14.4	0	0
145	56.6658	Female	0	0	Others or unknown	0	140	74	no AVF	AVF	3/w	1.64	9.13973	2.315	2.935	39.65	112.5	566	261.5	0.411765	4.41176	14	0	1
146	57.6658	Female	0	0	HT	0	128	70	no AVF	AVF	3/w	1.3	2.88219	2.925	2.465	36.8	122	485.5	180.5	0.266667	3.86667	13.35	0	0
147	49.3315	Male	0	1	HT	1	140	95	no AVF	AVF	Others	0.8	1.63014	1.565	2.265	41.65	109.5	457	353.5	0.391304	3.3913	14.8	0	1
148	32.2329	Male	0	0	HT	0	180	90	AVF	AVF	Others	1.2	3.04932	3.24	2.77	35.65	85	590.5	1900	0.259259	3.33333	15.85	0	0
149	72.5945	Female	0	0	HT	0	176	92	no AVF	AVF	Others	1.1	3.04932	3.465	2.055	32.95	95	555	545	0.333333	5.11111	15.35	0	0
150	35.6493	Male	0	0	HT	0	160	100	no AVF	AVF	Others	1.2	1.88219	1.995	3.075	40.1	119	536	675.5	0.185185	2.2963	13.15	0	1
151	34.2356	Male	0	0	CGN	1	165	105	no AVF	AVF	Others	0.85	4.13425	2.25	2.65	39.4	105	489	467.5	0.310345	2.68966	13.85	0	0
152	52.3315	Female	0	0	HT	0	143	84	no AVF	AVF	3/w	1.41	5.13699	1.36	2.655	44.7	122.5	671	949	0.314286	4.42857	15.2	0	0
153	26.3918	Male	0	0	CGN	0	186	128	no AVF	no AVF	Others	1.18	1.21644	1.89	3.04	40.25	135	429	459	0.285714	3.85714	14.1	0	0
154	41.7397	Female	0	0	Others or unknown	0	160	100	no AVF	AVF	3/w	1.39	3.46301	1.49	3.185	43.7	105.5	547.5	536.5	0.136364	2.54545	14.3	0	0
155	50.6603	Female	0	0	DN	0	139	86	no AVF	AVF	Others	1.54	0.463014	2.375	2.525	39.55	91	421.5	261.5	0.222222	2.18519	13.75	0	0
156	51.3315	Male	0	1	CGN	1	125	72	AVF	AVF	3/w	1.34	14.6384	2.005	2.66	41.35	128	511	330.5	0.2	2.73333	14.5	0	1
157	28.8986	Male	0	0	Others or unknown	1	130	80	no AVF	AVF	3/w	0.97	5.13699	1.88	2.525	40.7	113	409	660	0.37037	2	13.25	0	0
158	57.4137	Female	0	0	CGN	0	116	67	no AVF	AVF	Others	1.49	3.54795	3.29	2.285	35.8	101	436.5	54.6	0.275862	2.7931	14.2	0	0
159	44.8493	Female	0	0	Others or unknown	0	140	69	AVF	AVF	Others	1.57	8.21918	1.965	2.68	39.55	103.5	466	203	0.333333	3.875	13	0	0
160	37.4849	Male	0	0	Others or unknown	1	151	107	no AVF	AVF	Others	1.33	6.55068	2.07	1.9	39.2	100	639.5	618.5	0.148148	2.18519	13.95	0	0
161	46.9945	Female	0	1	HT	0	179	112	no AVF	AVF	3/w	1.04	3.30137	2.97	2.095	35.8	104.5	488.5	620	0.25	2.4	15.7	0	0
162	54.2493	Male	0	1	Others or unknown	0	132	71	no AVF	AVF	Others	1.04	4.21644	2.51	2.35	38.95	117	470	1112	0.208333	4.25	14.2	0	1
163	45.5753	Male	0	0	CGN	0	150	100	AVF	AVF	3/w	1.12	2.88219	1.825	1.48	41.65	117	419	1292.5	0.285714	3.5	13.5	0	0
164	59.0849	Male	0	1	HT	1	138	75	AVF	AVF	3/w	0.9	3.21644	2.735	2.415	38.85	104	487	757	0.5	2.80769	14.85	0	0
165	29.5644	Male	0	0	Others or unknown	1	140	90	no AVF	AVF	Others	1.01	0.967123	1.83	2.11	42.55	86	479.5	181	0.16	2.48	13.55	0	0
166	61.0055	Female	0	1	PKD	0	138	84	no AVF	AVF	3/w	1.15	2.63014	2.96	1.725	37.45	117.5	369.5	273	0.113208	1.79245	16.4	0	0
167	61.9205	Male	0	1	CGN	0	173	81	no AVF	AVF	Others	1.23	8.80274	2.97	1.24	36.05	87.5	440	173	0.235294	2.44118	15	1	1
168	48.4932	Male	0	0	Others or unknown	0	148	100	no AVF	AVF	Others	1.07	22.1479	2.09	1.615	38.45	107.5	554	243	0.304348	3.30435	12.95	0	0
169	41.8219	Male	0	0	CGN	1	126	75	no AVF	AVF	Others	0.94	7.88493	2.305	2.32	39.35	108	466.5	239.5	0.282051	1.79487	13.4	0	0
170	51.4082	Male	0	0	HT	1	160	88	no AVF	AVF	3/w	0.91	7.88493	2.35	2.745	37.3	146.5	536	67.1	0.451613	3.19355	14.45	0	0
171	52.0795	Female	0	0	CGN	0	120	74	no AVF	AVF	3/w	1.42	1.54795	2.275	2.23	39.9	120	433.5	313	0.2	3.8	14.1	0	0
172	59.1699	Male	1	0	Others or unknown	0	126	74	AVF	AVF	3/w	1.04	14.2247	1.83	2.035	42.35	120	443.5	28.9	0.363636	2.72727	13.15	0	1
173	53.4959	Female	0	0	Others or unknown	0	169	97	AVF	AVF	Others	1.31	10.8027	1.71	2.5	42.55	112	510.5	992	0.538462	6.53846	13.85	0	0
174	50.1644	Female	0	0	PKD	0	119	84	no AVF	AVF	3/w		3.79726	2.81	2.515	38.1	148.5	439	623	0.714286	6	14.95	0	1
175	21.5589	Male	0	0	Others or unknown	1	150	97	no AVF	AVF	3/w		4.04932	2.025	2.505	41.35	108	397.5	144.5	0.28125	2	12.85	0	0
176	35.6493	Male	0	0	CGN	1	140	89	AVF	AVF	3/w	1.26	2.13425	2.045	2.395	40.4	122	604	164	0.3125	4.40625	13.5	0	1
177	46.7425	Male	0	0	Others or unknown	0	111	85	no AVF	AVF	Others	1.22	10.8877	1.86	0.7	40.5	122	554	114	0.26087	2.82609	13.15	0	0
178	47.4904	Male	0	0	Others or unknown	1	129	66	AVF	AVF	3/w	1.58	4.96986	2.805	2.04	37.4	114	457.5	187	0.322581	3.70968	14.85	0	0
179	67.0082	Male	0	0	HT	1	185	85	AVF	AVF	Others	0.85	2.04932	2.995	1.79	36.6	91.5	521.5	22.43	0.555556	5.61111	15.35	0	0
180	35.9233	Male	0	1	CGN	0	120	80	AVF	AVF	3/w	0.94	13.4712	1.92	2.85	41.95	114.5	620.5	802.5	0.243243	1.97297	13.9	0	0
181	59.5836	Male	0	0	CGN	0	155	94	no AVF	AVF	Others	1.23	3.63014	2.415	2.06	38.3	96	422.5	190.5	0.375	5.125	16.3	0	0
182	61.2548	Male	0	0	HT	0	134	72	no AVF	AVF	Others	1.3	10.3836	2.245	2.255	38.1	120.5	504.5	8.12	0.636364	7.09091	14.5	0	0
183	44.074	Female	0	0	CGN	0	140	80	AVF	AVF	3/w	1.22	7.05205	1.72	2.455	43.45	111.5	336.5	560	0.428571	4.51429	15.3	0	0
184	48.2438	Male	0	0	Others or unknown	0	192	111	no AVF	AVF	Others		6.55068	1.805	1.9	40.75	108	501.5	438	0.357143	4.35714	13.6	0	0
185	53.663	Male	0	1	HT	0	140	85	AVF	AVF	3/w	1.18	3.79726	2.865	1.76	37.1	95.5	516.5	84.95	0.346154	3.5	15.8	0	0
186	26.9808	Female	0	0	Others or unknown	0	129	84	no AVF	AVF	Others	1.3	6.21918	2.245	2.04	38.95	91	628.5	687.5	0.222222	7.40741	16.15	0	0
187	37.5699	Male	0	0	Others or unknown	1	140	80	no AVF	AVF	3/w	1.22	9.80274	2.66	2.085	38.7	121	491	299.5	0.222222	2.14815	13.95	0	0
188	40.9068	Female	0	0	CGN	0	130	90	AVF	AVF	Others	1.37	0.79726	2.065	2.86	41.4	114	392	383.5	0.206897	2.41379	13.65	0	0
189	47.6575	Male	1	0	DN	1	127	85	no AVF	AVF	3/w	1	0.79726	2.675	1.625	38.95	117.5	442	180.45	0.193548	3.03226	12.6	0	0
190	41.9068	Male	0	0	CGN	1	136	87	AVF	AVF	Others	0.87	1.54795	2.17	3.245	39.3	123.5	510.5	515.5	0.363636	5.63636	13.05	0	0
191	51.0795	Male	0	0	CGN	0	110	80	AVF	AVF	3/w	1.07	21.063	2.785	1.88	37.9	123	535	880	0.384615	3.23077	14.05	0	0
192	53.2493	Female	0	1	Others or unknown	0	118	83	no AVF	AVF	3/w	1.35	8.55342	2.375	2	39.2	123.5	375	82.65	0.230769	3.42308	14.9	1	1
193	32.3178	Male	0	0	CGN	0	109	74	no AVF	AVF	Others	1.26	3.96712	1.83	1.995	41.75	104.5	576	538.5	0.416667	4.91667	13.35	0	0
194	68.1753	Male	0	0	Others or unknown	0	173	88	AVF	AVF	Others	1.15	0.882192	2.045	1.32	39.9	88	432.5	969	0.409091	4.54545	13.2	1	1
195	52.0795	Male	0	0	CGN	1	180	100	no AVF	AVF	3/w	1.12	7.8	4.12	3.28	30.3	93.5	503	522.5	0.5	3.25	18.4	0	0
196	55.5808	Male	1	0	HT	1	156	85	no AVF	AVF	Others	1.15	4.13425	2.02	2.055	39.9	118.5	692	139.5	0.230769	3.46154	15.9	0	0
197	55.2493	Male	0	1	Others or unknown	1	166	86	no AVF	AVF	Others	1.02	13.9753	1.585	1.9	43.1	103	439	129.05	0.205882	1.73529	14.55	0	0
198	28.3151	Male	0	0	CGN	0	137	92	no AVF	AVF	Others	1.19	3.54795	2.96	2.61	36.55	102.5	640	937.5	0.48	3.84	13.5	0	0
199	55.9151	Male	0	0	CGN	1	160	90	no AVF	AVF	Others	1.06	5.21918	2.255	1.675	41.3	132.5	598	316.5	0.375	6	13.55	0	0
200	36.9041	Female	0	0	Others or unknown	0	135	78	no AVF	no AVF	Others	1.16	1.04932	2.375	2.725	39.65	113	471	471.5	0.214286	3	12.9	0	0
201	40.6548	Male	0	0	CGN	1	130	80	AVF	AVF	Others	1.08	7.30411	2.08	3.445	38.7	108.5	813.5	409	0.375	2.54167	14.4	0	0
202	47.5753	Female	0	0	HT	0	137	82	no AVF	AVF	Others	1.22	1.37808	3.08	2.755	35.95	106.5	393.5	782.5	0.266667	3.4	15.35	0	0
203	55.2493	Male	0	0	Others or unknown	1	170	100	no AVF	AVF	Others	1.32	4.30137	2.09	3.465	40.55	104	471.5	613	0.307692	3.65385	13.15	0	0
204	36.4849	Male	0	0	HT	0	175	124	no AVF	AVF	Others	1.46	3.63014	2.355	2.83	38.25	101	557.5	1420	0.148148	2.62963	14.65	0	0
205	48.9973	Male	0	0	CGN	1	110	70	AVF	AVF	3/w	0.89	13.0575	1.94	2.215	41.7	116.5	519	504.5	0.354839	2.83871	13.7	0	0
206	28.2301	Male	0	0	CGN	0	160	110	no AVF	AVF	3/w	0.8	6.05205	2.615	3.005	38.55	116.5	728.5	280.5	0.444444	4.07407	13	0	0
207	66.8384	Male	0	0	HT	0	130	80	no AVF	AVF	3/w	1.13	2.46301	2.48	1.81	38	111.5	451.5	246	0.636364	5.09091	14.35	0	0
208	41.8219	Male	0	0	HT	1	120	70	no AVF	AVF	3/w	0.92	7.71781	1.975	2.275	41.6	99.5	646.5	210.5	0.37931	2.86207	13.8	0	0
209	61.0877	Female	0	0	CGN	0	156	98	AVF	AVF	3/w	1.29	12.0548	2.775	1.78	36.3	93.5	515	337	0.230769	3.26923	15.2	0	0
210	45.9945	Female	0	0	Others or unknown	0	166	101	no AVF	AVF	Others	1.36	8.13699	1.665	2.55	41.6	103.5	470.5	635	0.5	7.41667	13.3	0	0
211	29.8137	Female	0	0	Others or unknown	0	145	100	no AVF	AVF	Others	1.53	7.05205	1.66	2.275	41	102.5	518.5	946.5	0.222222	2.7037	13.35	0	0
212	34.2356	Male	0	0	PKD	1	101	65	AVF	AVF	3/w	0.74	2.37808	1.97	1.875	40.55	124.5	473.5	518	0.368421	4.36842	13.85	0	0
213	44.2411	Male	0	1	Others or unknown	1	117	76	AVF	AVF	3/w	0.9	1.46301	2.795	2.335	38.25	127.5	565.5	321	0.52381	3.61905	13.45	0	1
214	47.9397	Female	0	0	Others or unknown	0	129	86	no AVF	AVF	3/w	1.09	5.96986	3.43	2.105	35.9	117.5	527.5	91.85	0.4	3.8	13.8	0	0
215	45.9096	Female	0	0	Others or unknown	1	125	84	AVF	AVF	3/w	1.51	4.8	2.705	2.15	38.2	98.5	529.5	407	0.344828	3.27586	15.3	0	0
216	65.6712	Male	0	0	HT	1	169	89	no AVF	AVF	Others	1.21	6.96986	2.335	1.725	38.8	103	505.5	351.5	0.269231	3.76923	15.95	0	0
217	60.6685	Male	0	1	Others or unknown	1	168	100	no AVF	AVF	Others	1.12	5.30411	2.06	2.34	40.8	119	585.5	544	0.533333	5.26667	13.8	1	1
218	56.1671	Female	1	1	DN	0	159	85	no AVF	AVF	3/w	1.26	2.79726	1.465	1.775	43.75	116	465	383.5	0.210526	3.84211	14.85	0	0
219	43.326	Male	0	0	Others or unknown	0	150	100	no AVF	AVF	3/w	0.92	11.1397	2.06	1.36	39.4	111	597		0.3	2.9	13.7	0	0
220	28.3945	Male	0	0	Others or unknown	0	144	96	no AVF	AVF	3/w	1.1	7.05205	2.195	1.375	38.65	110.5	627	4.95	0.4	3.2	14.8	0	0
221	41.326	Male	0	0	CGN	1	160	91	no AVF	AVF	Others	1.15	6.96986	2.12	2.795	41.5	139	457.5	516	0.341463	2.34146	15.7	0	0
222	39.8192	Male	0	0	CGN	0	142	90	no AVF	AVF	3/w	1.09	2.21644	3.05	1.32	35.05	96.5	366	225	0.5	3.55556	13.15	1	1
223	56.6658	Male	0	0	CGN	0	141	71	AVF	no AVF	3/w	1.08	1.79726	2.165	1.695	40.7	98.5	598	150.5	0.5	4.94444	13.95	0	0
224	37.2384	Male	0	0	CGN	1	160	80	no AVF	AVF	Others	1.05	1.54795	1.52	2.705	41.15	99.5	494	240	0.258065	2.87097	16.35	0	0
225	61.1726	Male	1	0	DN	1	136	71	no AVF	AVF	3/w	1.23	4.63288	1.82	2.235	41.75	101.5	509	181.15	0.148936	1.68085	13.3	0	0
226	34.3205	Male	0	0	CGN	0	130	84	AVF	AVF	Others	1.07	8.72055	1.685	2.885	43.1	124.5	683	263.5	0.454545	3.54545	12.8	0	0
227	37.8192	Male	0	0	CGN	1	113	84	no AVF	AVF	Others	1.07	11.3068	1.655	3.745	40.85	80.5	541	390	0.764706	6.11765	15.65	0	1
228	61.9205	Female	0	0	PKD	0	127	93	no AVF	AVF	Others	1.44	8.46849	2.8	2.065	37.8	108	378.5	280	0.142857	3.57143	13.2	0	0
229	70.7589	Male	0	0	Others or unknown	1	184	91	no AVF	AVF	Others	1.28	14.8904	2.34	1.715	37.85	117	590.5	257.5	0.1875	5.3125	14.4	0	0
230	35.9863	Male	0	0	CGN	0	150	85	AVF	AVF	3/w	1.11	2.46301	1.605	3.83	43.1	116	649	610.5	0.382353	4.08824	15.1	0	0
231	34.1534	Male	0	0	CGN	0	160	100	AVF	AVF	3/w	1.07	11.4685	1.725	2.895	42.9	114.5	551	1138	0.28	2.76	13.3	0	0
232	31.0658	Female	0	0	CGN	0	130	80	no AVF	AVF	Others	1.53	4.38082	2.035	1.485	40.65	106.5	475	373.5	0.0952381	2.38095	14.2	0	0
233	63.1726	Female	0	1	Others or unknown	0	163	84	AVF	AVF	Others	0.85	3.96712	3.265	2.085	34.3	110	483	389	0.25	1.89286	14.55	0	0
234	51.5781	Male	0	1	Others or unknown	0	129	83	AVF	AVF	Others	1.14	3.13425	2.275	2.795	39.5	108	528.5	69.1	0.285714	3.17857	13.55	0	0
235	28.5644	Male	0	0	HT	0	120	80	no AVF	AVF	3/w	1	2.63014	2.025	2.05	41.2	109.5	518.5	897	0.394737	3.31579	13.65	0	0
236	46.0767	Male	0	0	CGN	1	117	85	AVF	AVF	3/w	1.01	12.8904	2.785	2.18	38	100.5	589.5	864.5	0.692308	6	14.5	0	0
237	32.1507	Male	0	0	CGN	1	130	90	no AVF	AVF	3/w	1.05	3.63014	2.585	2.26	39	99	507.5	440	0.206897	2.93103	13	0	0
238	30.5644	Male	0	0	Others or unknown	0	130	90	no AVF	AVF	3/w	1.29	9.05479	1.735	0.835	43.75	115	418	907.5	0.230769	1.88462	12.85	0	0
239	44.4904	Male	0	0	Others or unknown	1	160	90	AVF	AVF	Others	1.26	10.0548	1.82	1.9	42.5	110	644.5	252	0.428571	3.71429	13.95	0	0
240	48.2438	Male	0	0	Others or unknown	1	121	76	AVF	AVF	3/w	0.92	4.38082	2.735	1.615	36.45	132	515	330.5	0.333333	2.43333	14.45	0	0
241	40.8219	Female	0	0	Others or unknown	0	134	72	no AVF	AVF	Others	1.44	6.63288	2.685	2.065	37.5	110.5	750	1301	0.333333	3.86667	14.15	0	0
242	37.4	Male	0	0	CGN	0	88	66	no AVF	AVF	3/w	1.15	4.88493	1.93	1.935	41.7	128.5	603	471	0.52	5	16.6	0	0
243	46.0767	Male	1	0	DN	0	150	80	no AVF	AVF	3/w	0.86	4.04932	2.435	2.055	39.25	108.5	484	347	0.315789	6	15	0	0
244	47.9096	Male	0	0	CGN	0	160	90	no AVF	AVF	3/w	0.9	7.21918	2.245	2.29	40.75	94	460	562	0.4375	3.8125	14.25	0	0
245	39.737	Male	0	0	CGN	0	135	96	no AVF	AVF	3/w	1.02	6.63288	2.755	2.905	35.95	118	575.5	1212	0.304348	4.21739	13.4	0	0
246	33.8164	Female	0	0	CGN	0	134	97	no AVF	AVF	3/w	1.66	5.55068	2.335	2.335	40.3	110	514.5	371	0.217391	3.43478	14.1	0	0
247	45.3288	Male	0	0	CGN	0	161	98	no AVF	AVF	Others	0.96	2.63014	3.105	2.24	36.35	99.5	447	553	0.37931	3.86207	13.2	0	0
248	51.4932	Male	0	1	DN	1	120	76	no AVF	AVF	3/w	0.94	2.63014	2.125	2.22	38.7	108	586	296.5	0.333333	3.91667	14	0	0
249	54.1671	Male	1	1	DN	1	164	91	AVF	AVF	3/w	0.85	4.88493	2.885	2.53	36.55	133.5	522.5	125.5	0.36	3.72	16.75	0	0
250	40.1562	Male	0	0	Others or unknown	0	167	109	AVF	AVF	Others	1.23	1.21644	2.435	1.59	38.95	94.5	413	201.5	0.25641	2.4359	16.6	0	0
251	41.9918	Male	0	0	Others or unknown	1	172	112	no AVF	AVF	Others	1.29	1.04932	1.27	2.55	44.95	103	553.5	101.5	0.185185	3.25926	14.15	0	0
252	24.1452	Male	0	0	Others or unknown	0	102	52	AVF	AVF	3/w	0.81	7.38082	1.48	1.92	44.4	107.5	520.5	350	0.275	2.525	14	0	0
253	35.4822	Male	0	0	HT	1	140	90	no AVF	AVF	3/w	0.88	3.13425	2.69	2.865	37.55	113.5	802	431.5	0.363636	6.72727	15.6	0	0
254	44.7425	Female	0	0	CGN	0	150	80	AVF	AVF	Others	1.29	1.79726	3.015	2.01	35.6	116.5	509.5	154.4	0.380952	3	13	0	0
255	58.337	Female	0	0	Others or unknown	0	135	78	no AVF	AVF	Others	1.64	12.4712	3.46	1.56	37.4	105	404	76.85	0.272727	2.86364	14.7	0	0
256	50.3315	Male	0	0	Others or unknown	1	176	88	AVF	AVF	3/w	0.99	10.3068	3.165	1.68	35.55	94	461.5	899.5	0.212121	2.39394	15.1	0	0
257	30.6466	Male	0	0	CGN	1	154	101	no AVF	AVF	3/w	1.03	0.715068	2.84	2.545	38.05	103	391	207.5	0.37037	4.66667	13.9	0	0
258	31.2329	Male	0	0	CGN	0	140	80	no AVF	AVF	3/w	0.77	6.55068	3.23	3.315	35.8	94	658	1481.5	0.419355	3.96774	14.95	0	0
259	51.3315	Male	1	0	CGN	0	155	83	no AVF	AVF	3/w	1.23	16.8932	2.64	2.505	37.35	107.5	690	588	0.242424	3.12121	15.3	0	1
260	33.5671	Male	0	0	CGN	0	120	80	no AVF	AVF	3/w	0.98	8.05205	2.64	2.315	38.5	111	273	1155.5	0.153846	1.38462	13.75	0	0
261	36.989	Female	0	0	PKD	0	130	80	no AVF	AVF	Others	1.26	4.13425	1.995	1.055	41.35	109.5	439	144	0.269231	4.5	13.05	0	0
262	46.0767	Female	0	0	Others or unknown	0	118	77	no AVF	AVF	3/w	1.28	10.5534	3.15	1.895	35.9	104	431.5	202	0.294118	3	14.7	0	0
263	53.5808	Male	0	0	CGN	1	146	86	no AVF	AVF	Others	1.28	12.5562	2.11	3.105	40.2	99.5	468.5	299.5	0.4375	4.3125	15.05	0	0
264	44.074	Female	0	1	Others or unknown	0	140	88	AVF	AVF	Others	1.1	12.0548	2.955	3.32	37.2	60.5	507	1283	0.6	4.93333	13.15	0	0
265	30.8986	Female	0	0	CGN	0	104	57	no AVF	AVF	Others	1.52	1.88219	3.185	1.785	37.6	100	498.5	270.2	0.276596	2.10638	15.05	0	0
266	48.2438	Male	0	0	CGN	1	170	101	no AVF	AVF	3/w	1.07	5.63288	1.895	2.535	42.6	96	444	1246.5	0.285714	5.33333	14.35	0	0
267	46.5753	Female	0	0	Others or unknown	0	161	98	no AVF	AVF	Others	1.21	3.37808	2.635	2.265	36.85	84	552.5	323.5	0.227273	3.95455	16.6	0	0
268	52.2466	Female	0	0	CGN	0	119	79	AVF	no AVF	Others	1.52	7.55068	1.72	3.41	43.1	89.5	493	1137	0.315789	4.10526	15.1	0	0
269	52.2466	Male	0	0	PKD	0	150	100	AVF	AVF	Others	1.09	2.63014	2.115	1.9	38	110	448.5	136	0.333333	4.38889	13.4	0	0
270	27.8959	Female	0	0	CGN	0	147	106	no AVF	AVF	Others	1.98	8.9726	2.65	0.92	38.85	93	534.5	1522	0.363636	3.22727	15.35	0	0
271	42.5726	Male	0	0	CGN	1	140	90	AVF	AVF	Others	1.06	11.1397	2.44	2.37	38.65	119	572	1900	0.266667	3.26667	13.6	0	0
272	53	Male	0	0	Others or unknown	1	170	95	no AVF	AVF	Others	1.02	2.37808	1.67	1.005	42.4	119	507	152	0.388889	3.05556	12.95	0	0
273	42.8219	Male	0	0	HT	0	130	90	no AVF	AVF	Others	1.17	7.8	2.285	2.26	40.65	109	422.5	926.5	0.363636	2.51515	14.95	0	0
274	38.6521	Male	0	0	CGN	1	70	50	AVF	AVF	Others	1.28	13.0575	2.595	2.475	38.45	101	594	1573	0.541667	3.83333	15	0	0
275	53.663	Female	0	0	HT	0	171	84	no AVF	AVF	Others	1.47	6.21918	2.78	1.2	37.55	106.5	515	137.75	0.636364	7.72727	13.55	0	0
276	52.9151	Female	0	0	CGN	0	101	70	no AVF	AVF	Others	1.24	5.63288	3.11	2.15	34.9	111.5	434	255.5	0.823529	5.58824	13.45	0	0
277	44.2411	Female	1	0	CGN	0	146	114	no AVF	AVF	3/w	1.82	0.463014	2.345	2.18	39.8	115	521.5	136.5	0.318182	3.54545	15.2	0	0
278	82.0192	Male	0	1	Others or unknown	0	135	75	no AVF	AVF	3/w	1.5	6.05205	3.36	1.365	34	94.5	558	100	0.631579	4.21053	17.05	0	0
279	68.0082	Male	0	1	DN	0	112	68	no AVF	AVF	3/w	1.3	0.463014	2.615	1.61	37.25	101.5	521.5	349	0.363636	4.18182	16.55	0	0
280	79.5973	Male	1	0	Others or unknown	0	131	70	AVF	AVF	3/w		0.463014	2.66	1.525	37.8	110	312	82.81	0.264706	2.64706	14.85	1	1
281	39.2384	Male	0	0	Others or unknown	0	154	105	no AVF	AVF	3/w		0.463014	1.515	2.505	44.15	87	529	300.5	0.235294	1.97059	14.6	0	0
282	51.6603	Female	0	0	PKD	0	110	70	no AVF	AVF	Others		0.463014	1.87	1.875	41.9	93	350	361	0.206897	1.7931	14	1	1
283	51.6603	Male	0	1	HT	0	139	81	AVF	AVF	Others	1.17	0.378082	2.515	2.185	38.65	104.5	441.5	27.85	0.272727	2.93939	14.8	0	0
284	64.4192	Female	0	1	CGN	0	172	80	no AVF	AVF	Others	1.49	12.4712	1.77	1.77	43.6	93.5	353	576	0.466667	3.4	14.5	0	1
285	40.7781	Male	0	0	Others or unknown	1	198	115	no AVF	no AVF	Others	1.14	0.463014	1.085	2.47	44.85	116	615	406	0.25	2.5	13.3	0	0
286	52.0795	Male	0	0	HT	1	139	89	AVF	AVF	Others		3.21644	2.2	1.38	37.75	97	435	204.5	0.176471	5.58824	14.7	0	0
287	53	Male	0	1	Others or unknown	1	122	77	no AVF	AVF	3/w	1.2	3.88219	1.675	1.985	41.45	121	365.5	262.5	0.4	2.75	13.95	0	0
288	57.1699	Male	1	0	DN	1	180	87	no AVF	AVF	3/w	0.98	1.63014	1.39	2.585	43.2	109	453	236.5	0.428571	8	16.95	0	0
289	43.9068	Male	0	0	CGN	0	115	76	no AVF	AVF	Others	1.15	11.3068	2.375	2.325	38.65	100	436.5	281	0.269231	2.34615	15.05	0	0
290	61.4164	Female	0	0	PKD	0	121	83	no AVF	AVF	3/w	1.54	0.715068	3.005	1.39	35.55	76	389	95.75	0.4	2.93333	15.35	0	0
291	46.2438	Male	0	0	Others or unknown	0	182	112	no AVF	AVF	3/w	1.29	3.79726	2.38	1.575	37	91.5	423	221.5	0.259259	2.18519	14.25	0	0
292	63.5863	Male	1	1	DN	1	141	78	no AVF	AVF	Others	1.34	3.0274	3.155	1.58	34	117	422	95.5	0.285714	5.78571	17.55	1	1
293	47.9096	Female	1	0	DN	0	145	73	no AVF	AVF	Others	1.3	5.88493	2.88	1.71	35.35	106	492.5	75.1	0.473684	5.94737	13.45	1	1
294	51.1644	Female	0	0	CGN	0	108	64	no AVF	AVF	Others	1.54	5.21918	2.3	2.375	40.4	130.5	583.5	284	0.361111	2.05556	14.75	1	1
295	67.5041	Male	0	1	Others or unknown	0	85	57	no AVF	AVF	3/w	1.2	7.38082	2.785	2.155	38.45	116	513	257.5	1.27273	6.36364	18.45	1	1
296	64.6712	Male	0	0	CGN	1	150	80	no AVF	AVF	Others	1.36	4.21644	2.405	2.13	38.05	93	384.5	168.5	0.36	3.72	14.9	1	1
297	73.3479	Male	0	0	CGN	0	207	77	no AVF	AVF	Others	1.56	1.79726	3.03	1.985	34.3	100.5	390	246	0.4375	3	15.35	1	1
298	70.3452	Female	1	1	DN	0	188	85	no AVF	AVF	3/w		0.967123	3.345	1.045	33.45	97	373	183.5	0.25641	2.53846	15.05	1	1
299	65.8384	Male	0	0	CGN	0	173	82	no AVF	AVF	3/w	1.21	12.6384	3.15	1.305	35.8	104.5	403	284	0.25	4.33333	14.75	1	1
300	58.8329	Male	1	0	DN	0	184	100	no AVF	AVF	3/w		0.378082	2.755	2.05	37.85	129	439.5	123	0.175824	1.7033	14.75	1	1
301	71.8411	Male	0	1	Others or unknown	0	194	96	no AVF	AVF	3/w	0.93	4.21644	2.835	1.46	37.05	83	348	614	0.368421	2.78947	14.9	1	1
302	63.9205	Male	1	1	DN	1	81	48	no AVF	AVF	3/w	1.19	2.88219	2.435	2.01	37.3	91	370.5	139.5	0.733333	5.13333	16.8	1	1
303	77.6795	Male	1	1	DN	1	172	86	AVF	AVF	3/w	1.24	0.547945	4.035	2.05	30.15	150.5	326	71.1	0.619048	3.95238	20.35	1	1
304	72.011	Male	0	0	Others or unknown	0	140	74	no AVF	AVF	Others	1.79	6.96986	3.4	1.205	33.8	106.5	324	125.1	0.333333	2.58333	17.25	1	1
305	62.2548	Female	1	1	DN	0	110	80	no AVF	AVF	3/w	1.13	4.13425	2.54	3.005	39.2	88	550	762.5	0.45	5.3	16.9	1	1
306	79.0164	Female	1	0	DN	0	184	64	AVF	AVF	3/w	1.6	4.8	3.955	0.955	30	74.5	346.5	149.5	0.285714	3.14286	14.7	1	1
307	44.9096	Male	0	0	Others or unknown	0	120	70	no AVF	AVF	Others	1.19	5.38082	2.395	2.425	39.35	115	385	331	0.777778	11.2222	14.7	1	1
308	78.7644	Male	0	0	Others or unknown	0	112	52	AVF	AVF	Others	1.27	9.46849	3.07	2.355	36.65	125.5	351.5	284.5	0.483871	2.93548	14.35	1	1
309	68.926	Female	1	0	DN	0	153	88	no AVF	no AVF	3/w	1.28	1.30137	3.055	1.25	34	105.5	501	998	0.307692	3.23077	13.8	1	1
310	62.4164	Female	1	0	DN	0	150	75	no AVF	AVF	Others	1.06	0.79726	2.415	2.425	37.45	121	421.5	317	0.5	4.5	14.9	1	1
311	67.8384	Male	1	0	DN	0	170	80	no AVF	AVF	3/w	1.2	3.21644	3.105	1.94	35.5	98.5	549	545	0.25	5.85	15.5	1	1
312	62.2548	Male	0	0	Others or unknown	1	140	80	no AVF	no AVF	Others	1.65	18.474	1.7	2.02	42.6	103.5	507	196.1	0.25	2.39286	13.55	1	1
313	68.2575	Male	0	1	HT	0	134	82	no AVF	AVF	Others	1.17	1.13425	3.155	1.29	33.95	119.5	512	75.35	0.45	3.075	13.95	1	1
314	66.8384	Male	1	0	Others or unknown	1	117	53	no AVF	AVF	Others	0.77	3.46301	3.075	2.84	35.15	122	735.5	1105	0.375	7	16.05	1	1
315	58.4986	Female	0	0	Others or unknown	0	124	70	no AVF	AVF	Others	1.65	1.96712	1.51	1.63	43	127	508	371	0.583333	4.25	13.9	1	1
316	67.0082	Female	1	1	DN	1	125	73	no AVF	AVF	3/w	1.34	1.71507	1.115	2.775	44.6	115.5	482	289.5	0.30303	3.84848	14.6	1	1
317	64.6712	Female	1	0	DN	0	139	67	no AVF	AVF	3/w	1.25	3.30137	3.245	2.09	34.1	95.5	587	107.55	0.366667	4.6	16	1	1
318	50.4082	Male	0	0	Others or unknown	0	130	90	no AVF	no AVF	Others		23.4767										1	1
319	47.5753	Female	1	1	DN	0	170	100	AVF	AVF	3/w	1.43	4.96986	1.89	1.74	41.25	97.5	475.5	287	0.307692	4.11538	17.55	1	1
320	84.0192	Male	0	0	Others or unknown	0	140	90	no AVF	AVF	Others	1.59	1.63014	2.57	1.145	38.7	113	350	59.3	0.26087	2.21739	13.55	1	1
321	56.1671	Male	1	1	DN	0	120	66	no AVF	AVF	3/w	1.13	1.71507	2.39	2.345	36.65	118	474.5	245.5	0.37931	4.34483	13.75	1	1
322	64.5041	Female	1	0	DN	1	130	82	no AVF	AVF	3/w	1.44	4.21644	2.75	1.61	37.6	114.5	478.5	57.45	0.681818	6	14.75	1	1
323	70.2603	Female	0	1	HT	0	110	70	no AVF	AVF	3/w	1.56	4.8	3.565	1.94	33.75	110	366	936.5	0.846154	7.61538	15.35	1	1
324	52.0795	Male	1	0	DN	0	159	77	no AVF	AVF	3/w	1.08	1.54795	2.19	1.99	39	103.5	361	79.8	0.228571	3.31429	14.8	1	1
325	51.8274	Female	1	0	DN	0	143	56	no AVF	AVF	Others		9.72055	3.015	1.205	35.95	72.5	626	70.05	0.368421	3.47368	13.65	1	1
326	66.0904	Male	1	0	DN	1	131	80	no AVF	AVF	Others	1.16	5.71781	4.18	2.63	30	106.5	435.5	92.65	0.333333	5.80952	17.4	1	1
327	62.8356	Male	1	1	DN	0	131	70	no AVF	AVF	3/w	1.31	2.71507	3.455	0.92	33.2	113.5	382.5	72.1	0.37037	4.14815	14	1	1
328	56.5836	Male	1	1	DN	1	139	79	no AVF	AVF	3/w	1.29	2.21644	3.73	2.165	31.9	111.5	429.5	181.5	0.230769	2.23077	14	1	1
329	45.7425	Male	0	1	HT	0	140	91	no AVF	AVF	Others	1.43	1.63014	2.875	1.595	38	91.5	540	183.5	0.578947	4.26316	13.6	1	1
330	75.5096	Male	1	0	DN	0	144	73	no AVF	AVF	3/w	1.1	1.46301	3.955	1.11	31.4	100.5	366.5	64.45	0.666667	4.46667	15.4	1	1
331	52.2466	Female	1	0	DN	0	138	92	no AVF	AVF	Others	1.63	6.13699	2.735	2.255	37.3	101.5	398	504.5	0.416667	5.41667	14.05	1	1
332	72.8438	Male	1	0	DN	0	148	83	no AVF	AVF	3/w	1.07	2.21644	2.175	1.865	38.9	87.5	395	279.5	0.4375	3.625	14.4	1	1
333	75.7616	Male	1	0	DN	0	190	100	no AVF	AVF	Others	1.07	3.54795	2.68	1.22	37.6	102.5	330.5	55.15	0.290323	3.06452	14.7	1	1
334	45.6575	Male	1	0	DN	1	140	70	no AVF	AVF	3/w	1.13	5.63288	2.495	1.305	37.85	117.5	324	970.5	0.222222	3.38889	14.25	1	1
335	50.5781	Male	0	1	Others or unknown	1	149	86	no AVF	AVF	3/w	1.02	16.474	2.775	2.785	37.95	119.5	518.5		0.473684	2.47368	16.65	1	1
336	75.8438	Female	0	1	PKD	0	159	93	AVF	AVF	3/w	1.25	9.63562	2.565	2	38.7	99	380.5	686.5	0.272727	2.27273	14.5	1	1
337	50.2466	Male	1	0	Others or unknown	1	160	100	no AVF	AVF	3/w	1.21	2.04932	2.14	3.28	38.95	92	662.5	226	0.1875	2.46875	14	1	1
338	50.5781	Female	1	0	DN	0	78	56	no AVF	AVF	3/w	1.34	2.71507	3.72	1.535	32.15	94.5	383.5	59.2	0.344828	2.65517	17.35	1	1
339	68.0082	Female	1	0	DN	0	199	93	no AVF	AVF	Others	1.49	2.13425	3.4	1.995	33.5	124	445	61.65	0.242424	3.30303	15.55	1	1
340	68.1753	Female	0	1	HT	0	128	65	no AVF	AVF	Others	1.73	5.8	2.865	2.97	37.3	102.5	576.5	198.5	0.444444	5.33333	14.95	1	1
341	68.926	Female	0	1	Others or unknown	0	179	81	no AVF	AVF	3/w	1.7	9.30685	2.58	2.14	38.3	124.5	434	316	0.375	2.875	16.65	1	1
342	67.2575	Male	1	1	DN	0	170	98	no AVF	AVF	3/w	1.44	0.715068	2.845	1.48	36.5	88	422.5	127.7	0.25	2.33333	14.4	1	1
343	58.8329	Male	0	1	CGN	0	140	101	no AVF	AVF	Others	1.49	5.05205	3.61	1.95	32.65	102.5	525.5	76.95	0.368421	5.05263	15.25	1	1
344	57.0027	Male	1	0	DN	1	206	100	no AVF	AVF	3/w	1.18	1.13425	2.99	1.33	37.1	103	410	23.05	0.241379	2.48276	13.55	1	1
345	63.2548	Male	0	1	HT	0	165	103	no AVF	AVF	Others	1.36	3.54795	1.79	2.105	40.75	104.5	387.5	393.5	0.40625	2	14.85	1	1
346	57.337	Male	0	1	PKD	0	80	51	no AVF	AVF	Others	1.64	2.37808	2.245	1.645	40.1	118.5	365.5	109.4	0.266667	3	14.2	1	1
347	50.9973	Male	1	1	HT	1	133	84	no AVF	AVF	3/w	1.43	1.46301	1.85	1.77	41.25	115.5	386	135	0.375	7.0625	15.7	1	1
348	61.8356	Male	1	1	DN	1	178	59	no AVF	AVF	3/w	1.2	2.13425	2.795	2.68	36.4	122	360.5	115.45	0.259259	2.62963	15.3	1	1
349	80.7671	Male	0	1	Others or unknown	0	185	105	no AVF	AVF	Others	1.6	4.04932	3.15	0.86	35.95	119.5	411	85.55	0.461538	4.76923	15.65	1	1
350	55.663	Male	0	0	Others or unknown	1	155	89	no AVF	AVF	3/w	1.16	1.88219	3.26	2.595	34.75	86	528	314	0.411765	4.05882	16.2	1	1
351	60.7534	Female	1	0	CGN	0	144	84	no AVF	no AVF	3/w		4.13425	2.345	3.6	40.5	104.5	674.5	173	1.06667	5.93333	14.05	1	1
352	66.3425	Male	1	1	DN	1	180	110	no AVF	AVF	3/w	1.21	5.8	2.41	2.725	36.85	126.5	454	482	0.785714	7.85714	16.2	1	1
353	46.6575	Male	0	0	Others or unknown	1	180	90	no AVF	AVF	3/w	0.92	4.38082	3.26	2.72	37.7	103.5	444	698	0.310345	4.68966	15.35	1	1
354	37.0712	Male	0	0	CGN	1	130	90	no AVF	no AVF	3/w	1.07	5.8	1.645	2.875	43.75	100.5	464	1648.5	0.611111	7.61111	14.4	1	1
355	48.4932	Female	0	0	CGN	0	140	70	no AVF	AVF	Others		5.05205	2.355	3.23	40.25	94	505	733.5	0.533333	7.26667	13.9	1	1
356	61.2548	Male	0	0	Others or unknown	0	195	115	no AVF	AVF	Others	1.15	1.71507	2.285	2.81	39.4	111.5	661.5	717.5	0.6	6	15.2	1	1
357	66.2575	Male	1	0	CGN	0	171	91	no AVF	AVF	Others	1.07	2.76986	2.6	2.155	36.25	98.5	457	372	0.666667	5.75	16.35	1	1
358	44.4055	Male	0	0	Others or unknown	1	225	148	no AVF	AVF	Others	1.08	2.88219	0.765	1.64	44.8	113	501.5	204.5	0.25	2.875	13.55	1	1
359	66.589	Male	1	1	DN	0	119	76	no AVF	AVF	3/w	1.08	4.55068	2.475	2.355	37.5	113	479	613.5	0.24	3.68	14.35	1	1
360	50.7479	Male	0	0	Others or unknown	1	160	90	AVF	AVF	3/w	1.37	4.8	3.075	2.83	35.45	83	628	663.5	0.266667	8.06667	14.8	1	1
361	48.2438	Male	0	1	PKD	1	114	79	no AVF	AVF	Others	0.84	5.88493	3.305	2.58	34.5	122.5	559	122	0.611111	4.33333	17	1	1
362	68.0082	Male	0	1	PKD	0	136	76	no AVF	AVF	3/w	1.2	3.46301	3.32	2.425	33.95	106.5	523	407.5	0.636364	4.63636	18.25	1	1
363	59.0027	Female	0	0	PKD	0	161	87	no AVF	AVF	3/w	1.53	8.21918	1.87	1.71	43.1	102.5	363.5	616.5	0.277778	3.5	15.4	1	1
364	47.4904	Female	0	0	CGN	0	172	100	no AVF	AVF	Others	1.37	4.88493	2.15	2.22	41.35	87	467.5	581.5	0.380952	4.47619	16.75	1	1
365	49.7452	Female	0	0	HT	0	158	104	AVF	AVF	3/w	1.28	12.5562	2.565	3.235	40.35	98	689.5	177.25	0.266667	2.35556	13.3	1	1
366	59.8548	Male	0	1	PKD	0	140	90	no AVF	AVF	3/w	1.36	7.21918	2.015	1.96	42	116	473.5	633	0.393939	2.78788	14.25	1	1
367	66.0082	Male	0	0	PKD	0	140	90	AVF	AVF	Others		10.0548	3.635	1.38	32.65	114	386	275.55	0.928571	5.14286	16.6	1	1
368	59.1397	Male	0	1	CGN	1	170	74	no AVF	AVF	3/w		1.54795	1.47	2.845	43.2	68.5	334	193.5	0.363636	3.77273	17.5	1	1
369	40.1562	Male	0	0	Others or unknown	0	130	80	no AVF	AVF	3/w		2.46301	2.675	2.26	38.1	108.5	543.5	257	0.882353	6.58824	14	1	1
370	62.4164	Male	1	1	DN	1	180	95	no AVF	AVF	3/w		0.715068	3.785	2.52	31.8	112	491	120.15	1	5.73333	17.1	1	1
371	86.2712	Female	1	0	PKD	0	150	95	no AVF	no AVF	3/w		4.21644	2.73	1.145	36.85	67.5	263	259	0.12	2.56	21.7	1	1
372	80.3616	Male	0	1	CGN	0	150	70	no AVF	AVF	3/w		6.63288	3.565	1.845	34.15	98	330.5	203.85	1.0625	6.6875	17.7	1	1
373	42.4466	Male	0	0	CGN	0	130	82	no AVF	AVF	3/w		10.2219	2.65	1.59	37.95	118.5	464	58.6	0.363636	4.09091	14.15	1	1
374	47.4904	Male	0	1	Others or unknown	0	166	109	no AVF	AVF	Others		3.38904	2.87	2.86	37.8	117	534	281.5	1	5.86667	16.5	1	1
375	89.4356	Male	0	1	Others or unknown	0	156	69	no AVF	AVF	Others		0.882192	4.89	2.41	25.5	90.5	297	23.95	0.625	4.375	19.8	1	1
376	55.6767	Female	0	1	PKD	0	156	88	no AVF	AVF	Others		5.13699	2.815	2.05	37.95	101.5	428.5	64.6	0.269231	2.26923	14.25	1	1
377	63.7534	Male	1	1	DN	0	161	93	no AVF	AVF	Others		1.54795	2.27	1.25	39	107.5	429	511	0.391304	4.30435	15.95	1	1
378	50.9123	Male	0	1	Others or unknown	0	132	84	no AVF	AVF	Others		6.30411	2.56	2.905	38.2	94.5	474.5		0.166667	2.41667	15.2	1	1
379	39.0712	Male	0	0	CGN	0	135	89	no AVF	AVF	3/w		13.1425	1.955	2.77	41.15	123	468	1132	0.264706	1.70588	14.5	1	1
380	56.4137	Male	1	0	Others or unknown	0	185	104	no AVF	AVF	3/w		3.88219	3.05	2.54	35.9	84.5	553.5	136.5	0.45	7.55	16.05	1	1
381	74.3479	Male	0	0	HT	1	165	101	no AVF	AVF	Others		1.54795	2.76	1.95	37.4	103.5	470.5	64.4	0.346154	3.73077	14.65	1	1
382	58.337	Male	1	0	DN	1	138	77	AVF	AVF	3/w		0.715068	1.99	2.15	41.3	109.5	551	85.4	0.434783	8.30435	16.95	1	1
383	79.2658	Male	1	0	DN	0	156	75	AVF	AVF	3/w		1.88219	2.475	0.995	38.05	106.5	415	189.5	0.375	2.75	14.35	1	1
384	70.4219	Female	1	0	DN	0	182	84	no AVF	AVF	3/w		3.79726	2.65	2.14	36.7	122.5	434	464	0.291667	3.20833	16.7	1	1
385	85.4329	Male	0	1	Others or unknown	1	130	80	no AVF	AVF	3/w		1.46301	2.73	2.185	36	128	332.5	193	0.458333	3.54167	14.55	1	1
386	74.5945	Female	0	0	Others or unknown	0	208	112	AVF	AVF	Others	1.68	7.05205	2.81	0.935	38.15	126.5	370	44.8	0.193548	2	14.85	1	1
387	73.3479	Female	1	0	Others or unknown	0	172	73	no AVF	AVF	3/w		2.46301	3.06	2.015	35.7	78	345	136	0.75	5.9375	16.9	1	1
388	82.4301	Male	1	0	DN	0	84	44	no AVF	no AVF	Others		3.13425	3.425	1.425	32	108.5	453	136	1.27778	4.55556	17.4	1	1
389	50.0795	Male	0	0	CGN	0	130	80	no AVF	AVF	3/w		22.4767	2.815	2.605	36.9	81.5	488	715	0.444444	4.38889	15.7	1	1
390	57.9178	Female	0	1	Others or unknown	0	180	100	AVF	AVF	3/w	1.92	10.8877	2.45	2.16	38.75	103	435	117.7	0.6	4.6	17.3	1	1
391	52.411	Male	0	0	Others or unknown	1	184	103	no AVF	AVF	3/w		9.05479	2.52	1.82	39.05	119.5	340	541.5	0.3125	3	14.9	1	1
392	51.0438	Female	0	0	Others or unknown	0	140	85	no AVF	AVF	Others		20.0603	2.285	2.35	39.4	81	414.5	620	0.304348	2.65217	15.35	1	1
393	53.411	Male	0	0	CGN	0	190	100	AVF	AVF	3/w		4.55068	2.26	2.38	39.25	128.5	533.5	102.55	0.217391	3.17391	14.1	1	1
394	62.0055	Male	1	0	DN	0	160	86	no AVF	AVF	3/w	1.1	3.46301	2.23	1.685	38.7	103.5	486.5	109.5	0.241379	3.55172	13.3	1	1
395	65.589	Male	1	0	DN	0	169	88	AVF	AVF	3/w	1.61	6.88493	3.23	2.375	34.5	106.5	405	122	0.24	2.92	15.25	1	1
396	35.9014	Female	1	0	DN	0	121	80	no AVF	AVF	3/w		0.630137	1.735	1.585	42.75	113	498.5	107	0.342105	4.36842	14	1	1
397	58.1288	Male	0	1	CGN	0	140	80	no AVF	no AVF	3/w		30.2356	3.75	1.75	30.45	111.5	362	15.5	0.25	2.55556	15.15	1	1
398	81	Female	0	1	Others or unknown	0	131	77	no AVF	no AVF	Others	1.18	8	3.51	1.4	32.5	89	298	389	0.222222	2.33333	15.3	1	1
