# Supplementary material for: Development of a prediction model to estimate the 5-year risk of cardiovascular events and all-cause mortality in haemodialysis patients: a retrospective study
Source: PeerJ journal article supplement (doi:10.7717/peerj.14316), 2022-11-09
Supplement: Supplemental_Figure_S2.pdf [file Supplemental_Figure_S2.pdf]

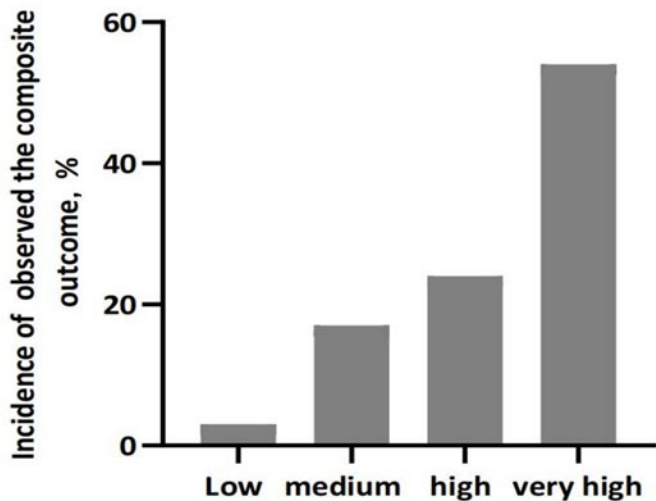

| Categories     | Low risk | Medium Risk | High Risk | Very high risk |
|----------------|----------|-------------|-----------|----------------|
| Score (points) | 0-2      | 3-4         | 5-6       | 7-13           |
| Incidence (%)  | 3.23     | 17.4        | 24.5      | 54.8           |
